# Supplementary material for: Ionothermal synthesis of activated carbon from waste PET bottles as anode materials for lithium-ion batteries
Source: Royal Society of Chemistry journal article supplement (doi:10.1039/d2ra06786b), 2022-01-01
Supplement: d2ra06786b1.pdf [file d2ra06786b1.pdf]

## **Ionothermal Synthesis of Activated Carbon from Waste PET Bottles as Anode Materials for Lithium-Ion Batteries**

Cyril O. Ehi-Eromosele<sup>1,2,\*</sup>, Chizoom N. Onwucha<sup>1,2</sup>, Samuel O. Ajayi<sup>1,2</sup>, Georgian Melinte<sup>4</sup>, Anna-Lena Hansen<sup>1</sup>, Sylvio Indris<sup>1,3</sup>, Helmut Ehrenberg<sup>1,3</sup>

<sup>1</sup>Institute for Applied Materials (IAM), Karlsruhe Institute of Technology (KIT), 76344 Eggenstein-Leopoldshafen, Germany.

<sup>2</sup>Department of Chemistry, Covenant University, PMB 1023, Ota, Nigeria

<sup>3</sup>Helmholtz Institute Ulm (HIU) Electrochemical Energy Storage, Helmholtzstrasse 11, 89081 Ulm, Germany.

<sup>4</sup>Institute of Nanotechnology (INT), Karlsruhe Institute of Technology (KIT), Hermann-von-Helmholtz-Platz 1, 76344 Eggenstein-Leopoldshafen, Germany.

### **Corresponding Author**

\*Email: [cyril.chi-eromosele@covenantuniversity.edu.ng](mailto:cyril.chi-eromosele@covenantuniversity.edu.ng)

## **SUPPORTING INFORMATION**

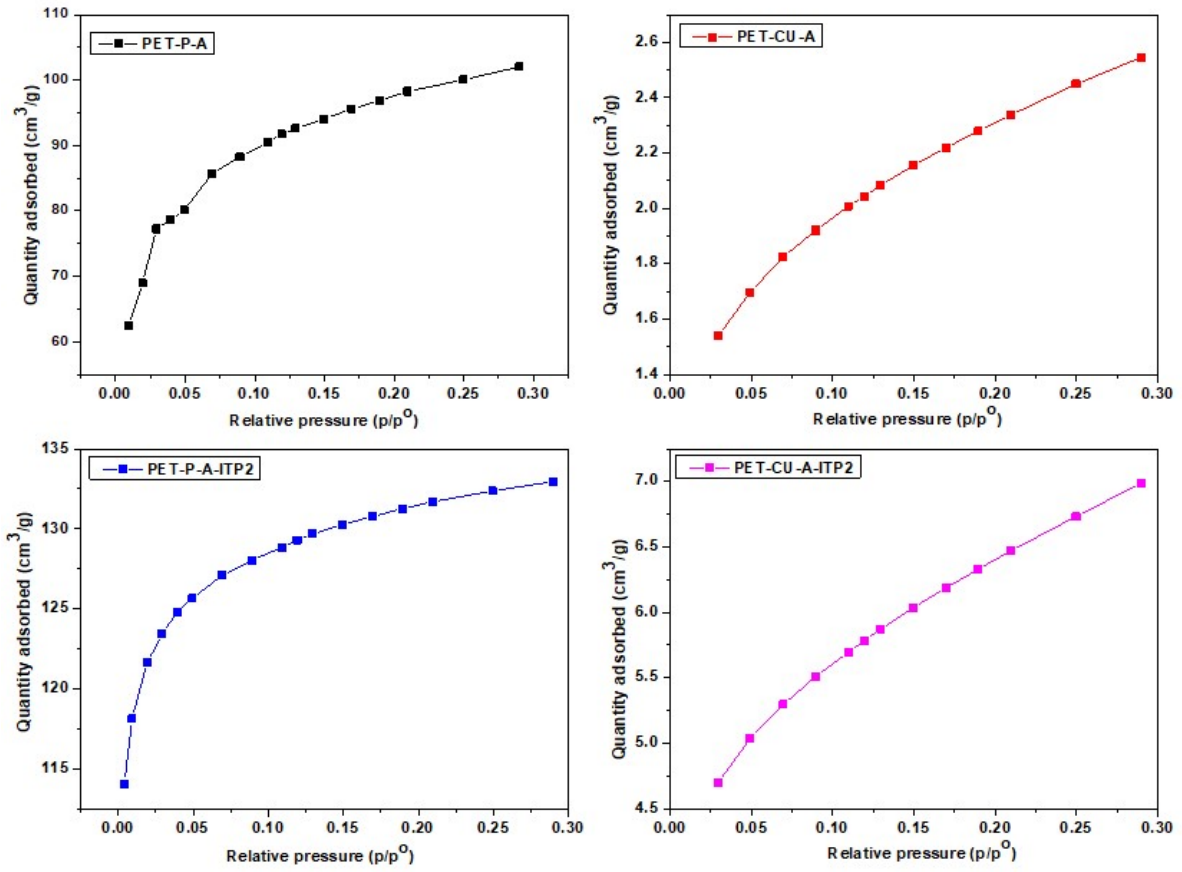

**Figure S1.** Nitrogen adsorption isotherms of activated carbons derived from PET

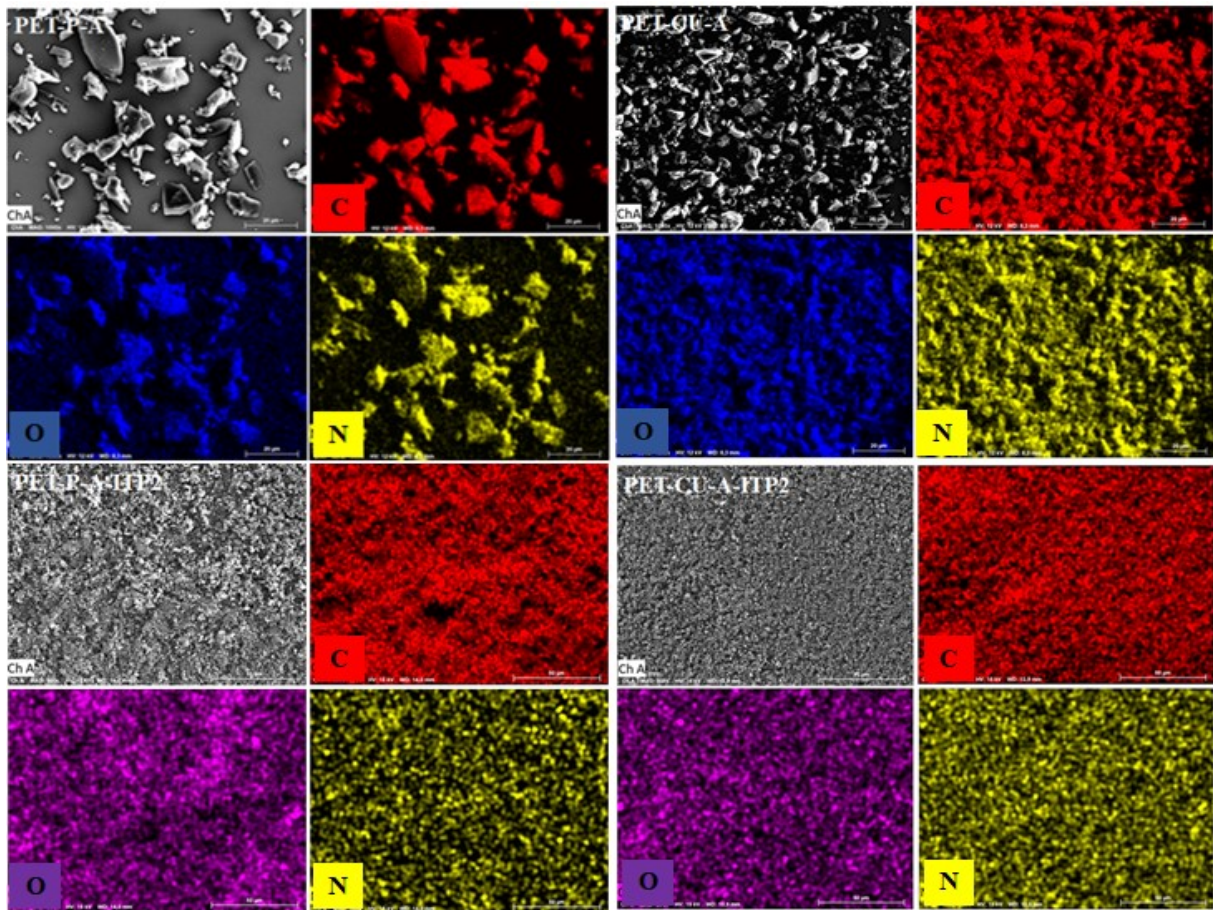

**Figure S2.** SEM images of activated carbons derived from PET and their corresponding EDX mapping showing the distribution of C, N, and O elements in the materials.

**Table S1.** Electrochemical performance data of the charge-discharge curves for the 1st, 2<sup>nd</sup>, 30<sup>th</sup>, and 100<sup>th</sup> cycles of the carbon anode materials derived from PET cycled at a current density of 100 mA/g between 0.01 - 2.8 V (vs. Li/Li<sup>+</sup>) at 25°C.

| <b>Samples</b>          |                            | <b>PET-P-A</b> | <b>PET-CU-A</b> | <b>PET-P-A-ITP2</b> | <b>PET-CU-A-ITP2</b> |
|-------------------------|----------------------------|----------------|-----------------|---------------------|----------------------|
| 1 <sup>st</sup> cycle   | Charge capacity (mAh/g)    | 94.44          | 54.57           | 156.88              | 242.81               |
|                         | Discharge capacity (mAh/g) | 583.65         | 226.67          | 401.18              | 460.65               |
|                         | Capacity Loss (mAh/g)      | 489.21         | 172.10          | 244.30              | 217.84               |
|                         | Coulombic efficiency (%)   | 16.18          | 24.08           | 39.11               | 52.71                |
| 2 <sup>nd</sup> cycle   | Charge capacity (mAh/g)    | 103.36         | 99.62           | 164.23              | 255.23               |
|                         | Discharge capacity (mAh/g) | 173.77         | 160.26          | 197.31              | 282.65               |
|                         | Capacity Loss (mAh/g)      | 70.41          | 60.64           | 33.08               | 27.42                |
|                         | Coulombic efficiency (%)   | 59.48          | 62.16           | 83.24               | 90.30                |
| 30 <sup>th</sup> cycle  | Charge capacity (mAh/g)    | 268.61         | 129.20          | 202.20              | 294.32               |
|                         | Discharge capacity (mAh/g) | 278.51         | 135.42          | 205.07              | 295.99               |
|                         | Capacity Loss (mAh/g)      | 9.90           | 6.22            | 2.87                | 1.67                 |
|                         | Coulombic efficiency (%)   | 96.45          | 95.41           | 98.60               | 99.44                |
| 100 <sup>th</sup> cycle | Charge capacity (mAh/g)    | 268.37         | 131.46          | 184.19              | 275.40               |
|                         | Discharge capacity (mAh/g) | 288.16         | 131.74          | 185.48              | 276.11               |
|                         | Capacity Loss (mAh/g)      | 19.79          | 0.28            | 1.29                | 0.71                 |
|                         | Coulombic efficiency (%)   | 93.13          | 99.79           | 99.31               | 99.74                |

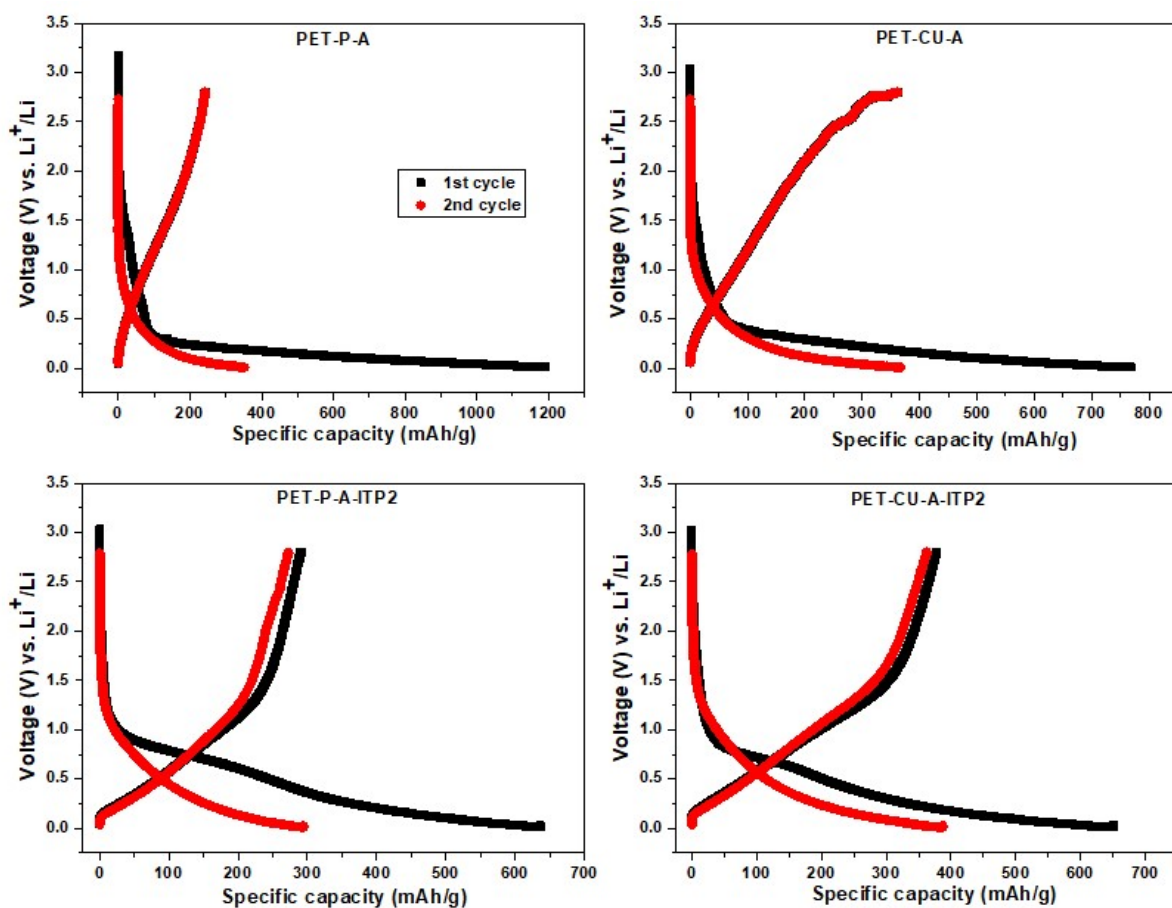

**Figure S3:** Galvanostatic charge-discharge profiles (1<sup>st</sup> and 2<sup>nd</sup> cycles) of the carbon anode materials derived from PET cycled at a current density of 50 mA/g between 0.01 - 2.8 V (vs. Li/Li<sup>+</sup>) at 25°C.

**Table S2.** Electrochemical performance data of the charge-discharge curves for the 1<sup>st</sup> and 2<sup>nd</sup> cycles of the carbon anode materials derived from PET cycled at a current density of 50 mA/g between 0.01 - 2.8 V (vs. Li/Li<sup>+</sup>) at 25°C.

|                       | Samples                    | PET-P-A | PET-CU-A | PET-P-A-ITP2 | PET-CU-A-ITP2 |
|-----------------------|----------------------------|---------|----------|--------------|---------------|
| 1 <sup>st</sup> cycle | Charge capacity (mAh/g)    | 242.60  | 361.50   | 290.57       | 377.23        |
|                       | Discharge capacity (mAh/g) | 1190.76 | 768.48   | 636.06       | 650.42        |
|                       | Capacity Loss (mAh/g)      | 948.16  | 406.98   | 345.49       | 273.19        |
|                       | Coulombic efficiency (%)   | 20.37   | 47.04    | 45.68        | 58.00         |
| 2 <sup>nd</sup> cycle | Charge capacity (mAh/g)    | 242.60  | 361.50   | 272.67       | 362.41        |
|                       | Discharge capacity (mAh/g) | 351.40  | 367.26   | 294.12       | 386.71        |
|                       | Capacity Loss (mAh/g)      | 108.80  | 5.76     | 21.45        | 24.30         |
|                       | Coulombic efficiency (%)   | 69.04   | 98.43    | 92.71        | 93.72         |

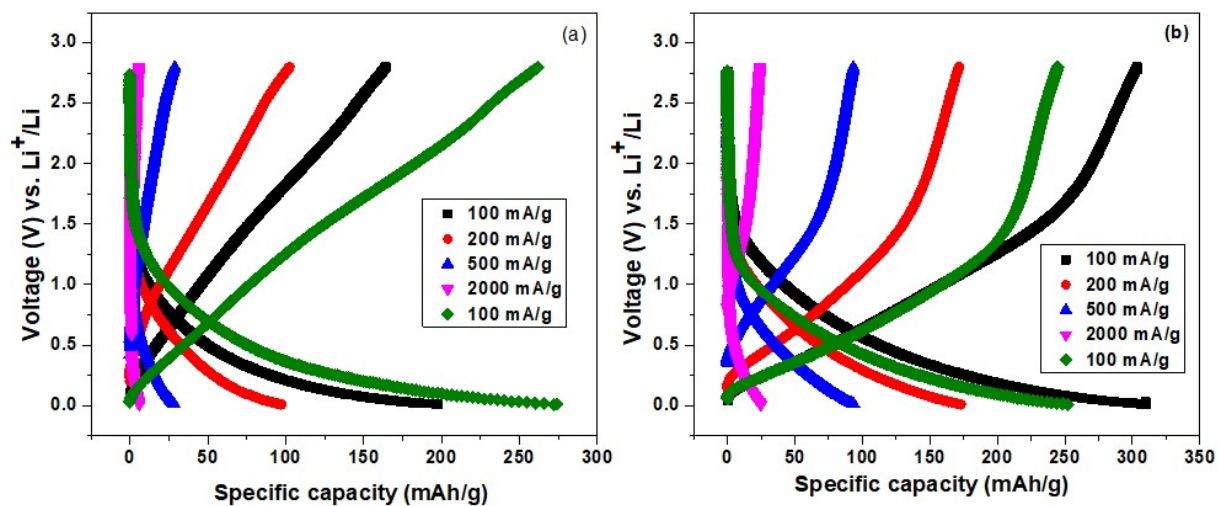

**Figure S4:** Rate performance test - galvanostatic charge-discharge profiles (10<sup>th</sup> cycle) of PET-P-A and PET-CU-A-ITP2 anodes cycled at varying current densities (100 – 2000 mA/g) between 0.01 - 2.8 V (vs. Li/Li<sup>+</sup>) at 25 °C.

**Table S3.** Comparison of PET-CU-A-ITP2 carbon with the state-of-the-art LIBs

| Material                         | Initial<br>Coulombic<br>Efficiency (%) | Discharge capacity<br>(2 <sup>nd</sup> cycle) mAh/g | References |
|----------------------------------|----------------------------------------|-----------------------------------------------------|------------|
| PET-CU-A-ITP2                    | 58                                     | 387 at 50 mA/g                                      | This work  |
| Carbon nanoparticles             | 55                                     | 742 at 100 mA/g                                     | [1]        |
| Porous carbon nanofibres         | 66                                     | 491 at 50 mA/g                                      | [2]        |
| Carbon nanofibres                | NA                                     | 483 at 50 mA/g                                      | [3]        |
| Banana peel derived carbon       | 69                                     | 826 at 50 mA/g                                      | [4]        |
| Graphene                         | 38                                     | 580 at 25 mA/g                                      | [5]        |
| Nitrogen doped graphitic carbons | 49                                     | 840 at 50 mA/g                                      | [6]        |
| Carbon aerogels                  | 63                                     | 310 at C/10                                         | [7]        |

## References

- 1 R. R. Gaddam, D. Yang, R. Narayan, K. V. S. N. Raju, N. A. Kumar, X. S. Zhao, *Nano Energy*, 2016, **26**, 346-352.
- 2 J. Liwen, Z. Xiangwu, *Nanotechnology*, 2009, **20**, 155705.
- 3 L. Ji, X. Zhang, *Electrochem. Commun.*, 2009, **11**, 684– 687.
- 4 E. M. Lotfabad, J. Ding, K. Cui, A. Kohandehghan, W. P. Kalisvaart, M. Hazelton, D. Mitlin, *ACS Nano*, 2014, **8(7)**, 7115-7129.
- 5 A. Kumar, A. L. M. Reddy, A. Mukherjee, M. Dubey, X. Zhan, N. Singh, L. Ci, W. E. Billups, J. Nagurny, G. Mital, P. M. Ajayan, *ACS Nano*, 2011, **5**, 4345-4349.
- 6 S-X. Wang, S. Chen, Q. Wei, X. Zhang, S. Y. Wong, S. Sun, X. Li, *Chemistry of Materials*, 2015, **27**, 336–342.
- 7 A. S. Alex, M. S. Ananda Lekshimi, V. Sekkar, B. John, C. Gouri, S. A. Ilangovan, *Polymers for Advanced Technologies*, 2017, <https://doi.org/10.1002/pat.4085>.
